# Supplementary material for: Ultra-small Bi2S3 nanodot-doped reversible Fe(ii/iii)-based hollow mesoporous Prussian blue nanocubes for amplified tumor oxidative stress-augmented photo-/radiotherapy
Source: Royal Society of Chemistry journal article supplement (doi:10.1039/c9bm02014d), 2020-01-01
Supplement: c9bm02014d1.pdf [file c9bm02014d1.pdf]

## Supporting Information

### **Ultra-small Bi<sub>2</sub>S<sub>3</sub> Nanodots-Doped Reversible Fe(II/III)-based Hollow Mesoporous Prussian Blue Nanocubes for Amplified Tumor Oxidative Stress Augmented Photo-/Radiotherapy**

Chuchu Ren<sup>1</sup>, Yu Cheng<sup>1</sup>, Wen Li<sup>1</sup>, Ping Liu<sup>1</sup>, Lifang Yang<sup>1</sup>, Qianglan Lu<sup>1</sup>, Min Xu<sup>1</sup>, Fengping Tan<sup>1</sup>, Jiao Li<sup>2\*</sup> and Nan Li<sup>1\*</sup>

1. Tianjin Key Laboratory of Drug Delivery & High-Efficiency, School of Pharmaceutical Science and Technology, Tianjin University, 300072, Tianjin, PR China

2. School of Precision Instruments and Optoelectronics Engineering, Tianjin University, Tianjin 300072, China

\*Corresponding authors: Email addresses: [linan19850115@163.com](mailto:linan19850115@163.com) (N. Li), [jiaoli@tju.edu.cn](mailto:jiaoli@tju.edu.cn) (J. Li).

## Content

**Figure S1.** TEM image of  $\text{Bi}_2\text{S}_3$  QDs.

**Figure S2.** HRTEM images of  $\text{Bi}_2\text{S}_3$  QDs.

**Figure S3.** HRTEM image of HMPB.

**Figure S4.** (a) Digital photos of HMPB/ $\text{Bi}_2\text{S}_3$  in distilled water, PBS, DMEM and FBS after 5 days. (b) Variation of hydrodynamic size of HMPB/ $\text{Bi}_2\text{S}_3$  NPs dispersed in various media measured by the DLS method.

**Figure S5.** FT-IR spectra of HMPB.

**Figure S6.** XRD patterns of HMPB.

**Figure S7.** XPS survey of  $\text{Bi}_2\text{S}_3$  QDs.

**Figure S8.** Temperature curves of different samples in 5 min under 808 nm laser irradiation.

**Figure S9.** Blood circulation profile of HMPB/ $\text{Bi}_2\text{S}_3$  nanoparticles.

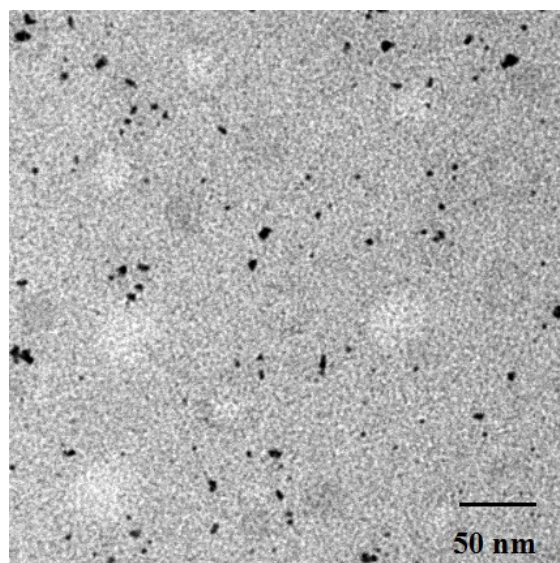

**Figure S1.** TEM image of Bi<sub>2</sub>S<sub>3</sub> QDs.

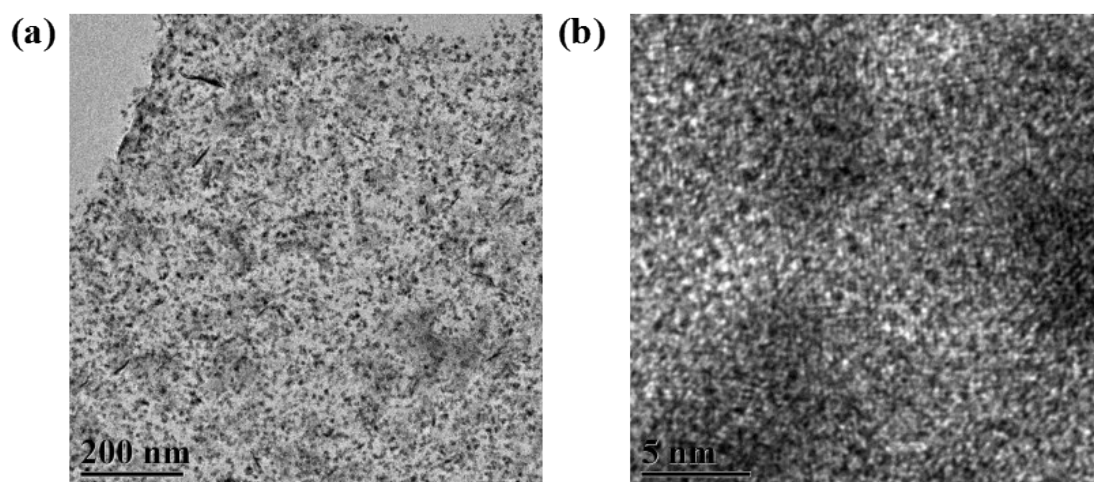

**Figure S2.** HRTEM images of Bi<sub>2</sub>S<sub>3</sub> QDs.

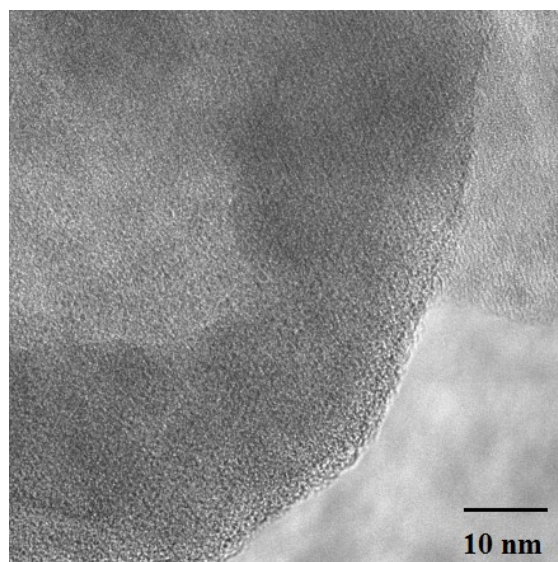

**Figure S3.** HRTEM image of HMPB.

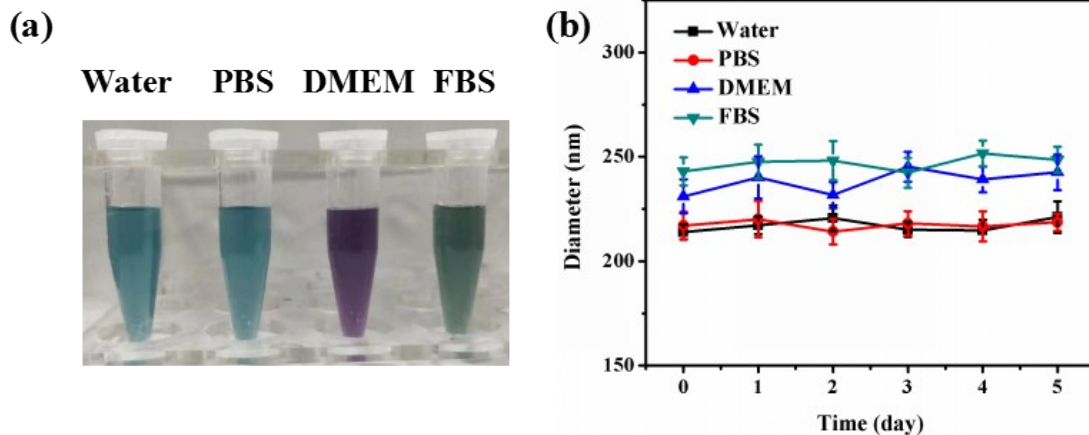

**Figure S4.** (a) Digital photos of HMPB/Bi<sub>2</sub>S<sub>3</sub> in distilled water, PBS, DMEM and FBS after 5 days. (b) Variation of hydrodynamic size of HMPB/Bi<sub>2</sub>S<sub>3</sub> NPs dispersed in various media measured by the DLS method.

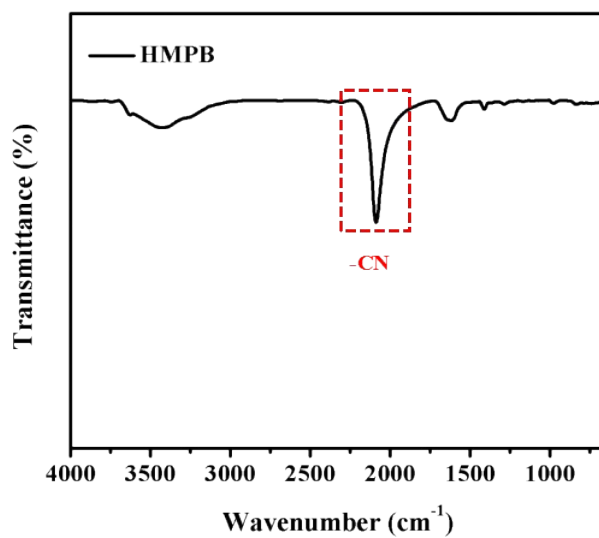

**Figure S5.** FT-IR spectra of HMPB.

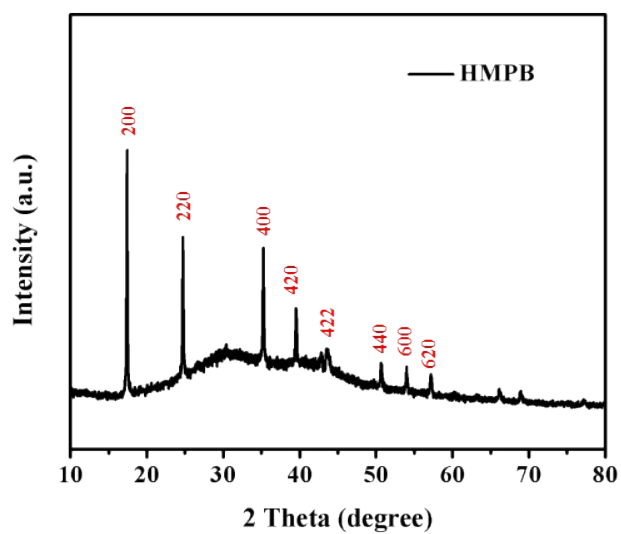

**Figure S6.** XRD patterns of HMPB.

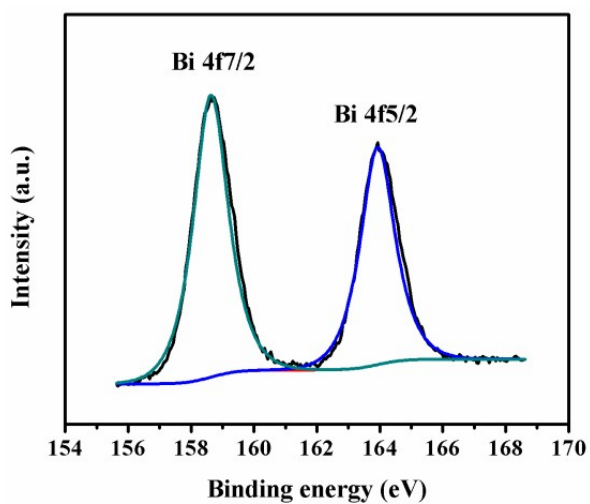

**Figure S7.** XPS survey of Bi<sub>2</sub>S<sub>3</sub> QDs.

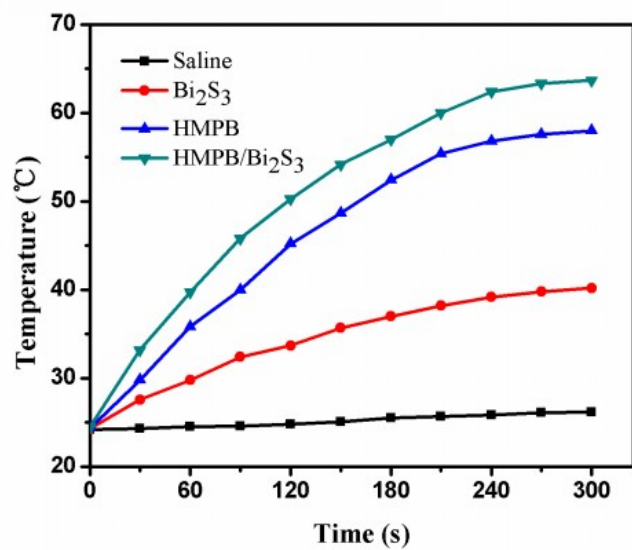

**Figure S8.** Temperature curves of different samples in 5 min under 808 nm laser irradiation.

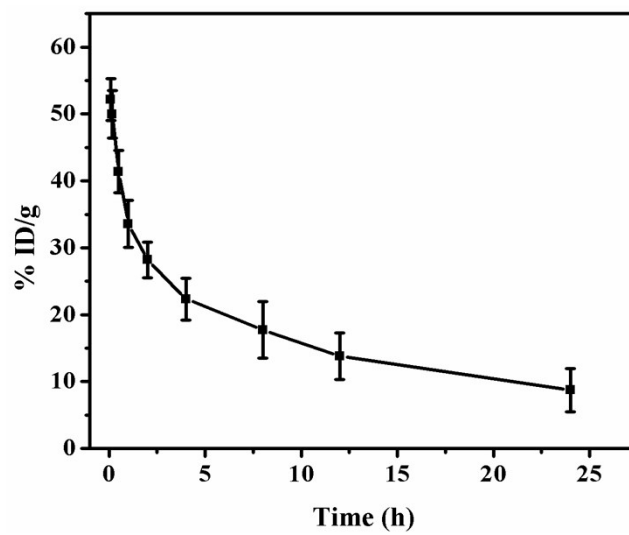

**Figure S9.** Blood circulation profile of HMPB/Bi<sub>2</sub>S<sub>3</sub> nanoparticles.
